# Supplementary material for: PKCθ Regulates Pituitary Adenoma Bone Invasion by Activating Osteoclast in NF-κB/IL-1β-Dependent Manner
Source: MDPI journal article supplement (doi:10.3390/cancers15051624), 2023-03-06
Supplement: s1 [file s1]

# Supplementary Materials: PKC $\theta$ regulates pituitary adenoma bone invasion by activating osteoclast in NF- $\kappa$ B/IL-1 $\beta$ dependent manner

Quanji Wang, Zhuowei Lei, Zihan Wang, Qian Jiang, Zhuo Zhang, Xiaojin Liu, Biao Xin, Sihan Li, Xiang Guo, Yanchao Liu, Xingbo Li, Kai Shu, Huaqiu Zhang, Yimin Huang and Ting Lei

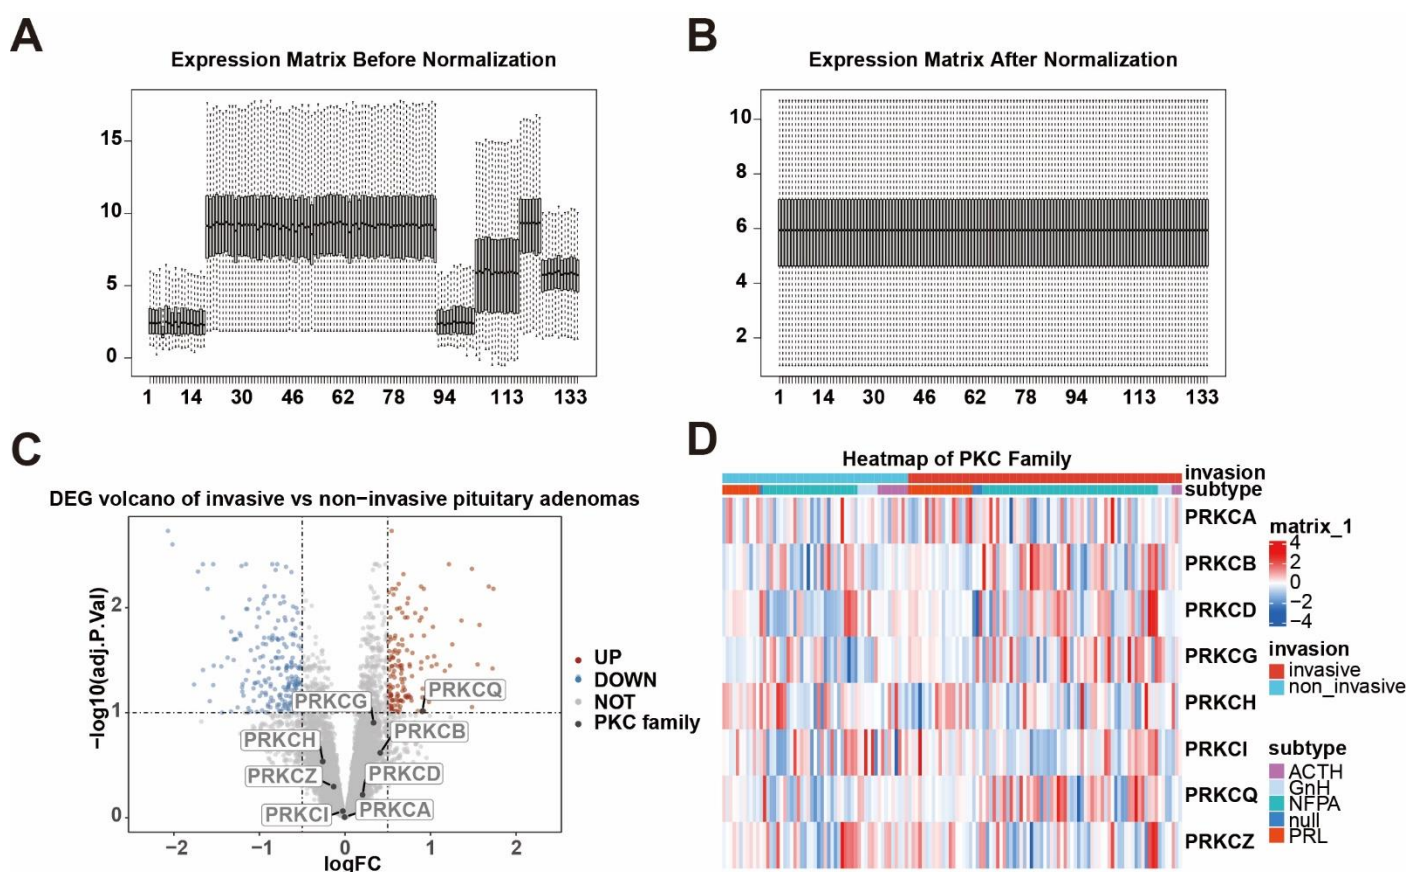

**Figure S1.** Bioinformatics data collation and analysis. (A, B) Boxplots show the intensity of the gene expression data before (A) and after (B) batch effect removal. (C) Volcano plot of DEGs between BIPAs versus non-BIPAs, emphasizing genes of PKC family. (D) Heatmap of gene expression data of PKC family in PAs.

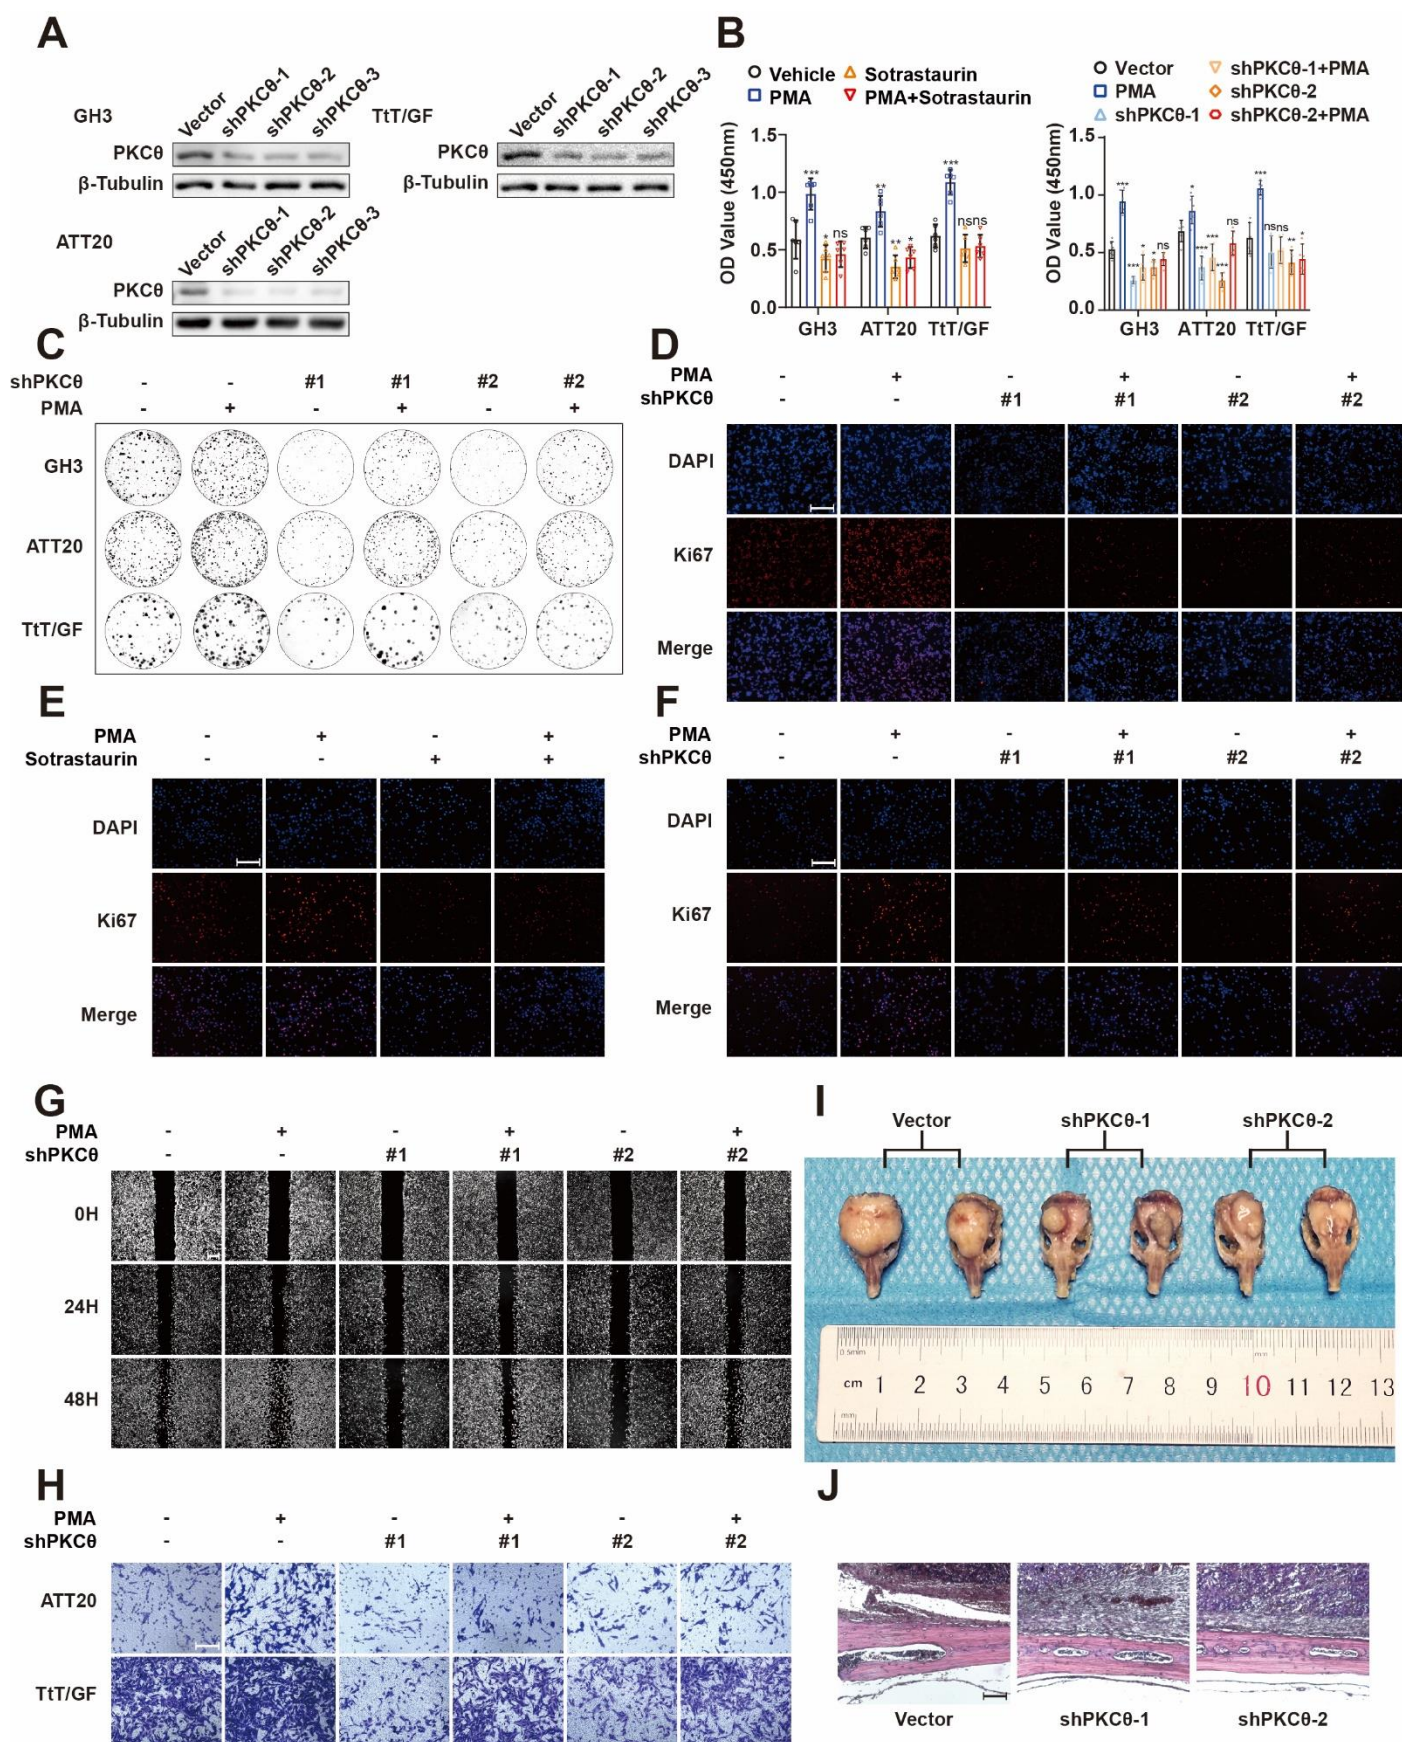

**Figure S2.** PKCθ in proliferation, migration and bone invasion of PAs. (A) WB verification of shPKCθ efficiency in PAs cell lines. (B) The CCK-8 cell viability assay of PAs cell lines treated by PMA and Sotrastaurin, left. The CCK-8 cell viability assay of shPKCθ in PAs cell lines, right. (\*\*\*)  $P < 0.001$



0.001; \*\*  $P < 0.01$ ; \*  $P < 0.05$ ; NS  $P \geq 0.05$ ) (C) The colony formation of shPKC $\theta$  in PAs cell lines. (D) The KI-67 staining of shPKC $\theta$  in GH3 cells ( $\times 200$ ; scale bar, 200  $\mu\text{m}$ ). (E) The KI-67 staining of TtT/GF treated by PMA and Sotrastaurin ( $\times 200$ ; scale bar, 200  $\mu\text{m}$ ). (F) The KI-67 staining of shPKC $\theta$  in TtT/GF cells ( $\times 200$ ; scale bar, 200  $\mu\text{m}$ ). (G) The wound healing assay of shPKC $\theta$  in TtT/GF cells ( $\times 100$ ; scale bar, 200  $\mu\text{m}$ ). (H) The transwell assay of shPKC $\theta$  in ATT20 and TtT/GF cells ( $\times 200$ ; scale bar, 200  $\mu\text{m}$ ). (I) Photographs of ATT20 calvaria xenograft tumor specimens in groups of vector and shPKC $\theta$ . (J) HE staining exhibited bone destruction of ATT20 tumors in groups of vector and shPKC $\theta$  ( $\times 40$ ; scale bar, 500  $\mu\text{m}$ ).

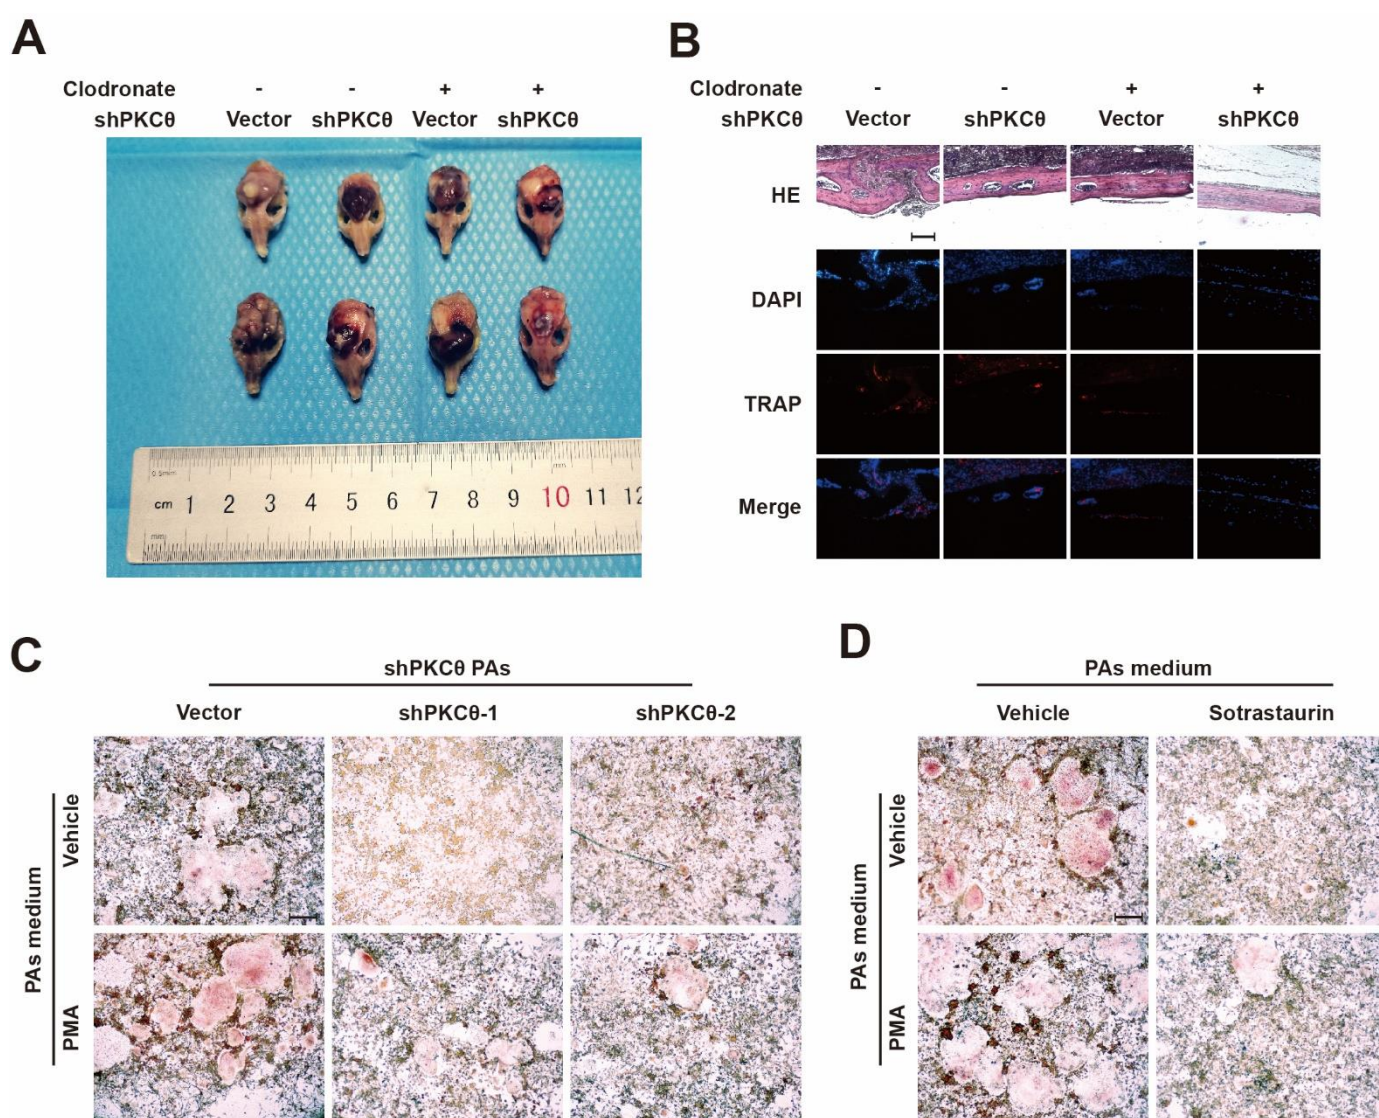

**Figure S3.** PAs induce macrophage-osteoclast differentiation via the paracrine pathway. (A) Photographs of ATT20 calvaria xenograft tumor specimens in treatment of Clodronate Liposomes and shPKC $\theta$ . (B) HE staining and immunofluorescence of TRAP $^{+}$  cells in the tumor-bone junction area ( $\times 200$ ; scale bar, 200  $\mu\text{m}$ ). (C) TRAP staining of RAW264.7 administrated of 30ng/ml RANKL and CM of ATT20 cells in groups of vector and shPKC $\theta$  ( $\times 40$ ; scale bar, 500  $\mu\text{m}$ ). (D) TRAP staining of RAW264.7 administrated of 30ng/ml RANKL and CM of ATT20 cells in treatment of Sotrastaurin and PMA ( $\times 40$ ; scale bar, 500  $\mu\text{m}$ ).



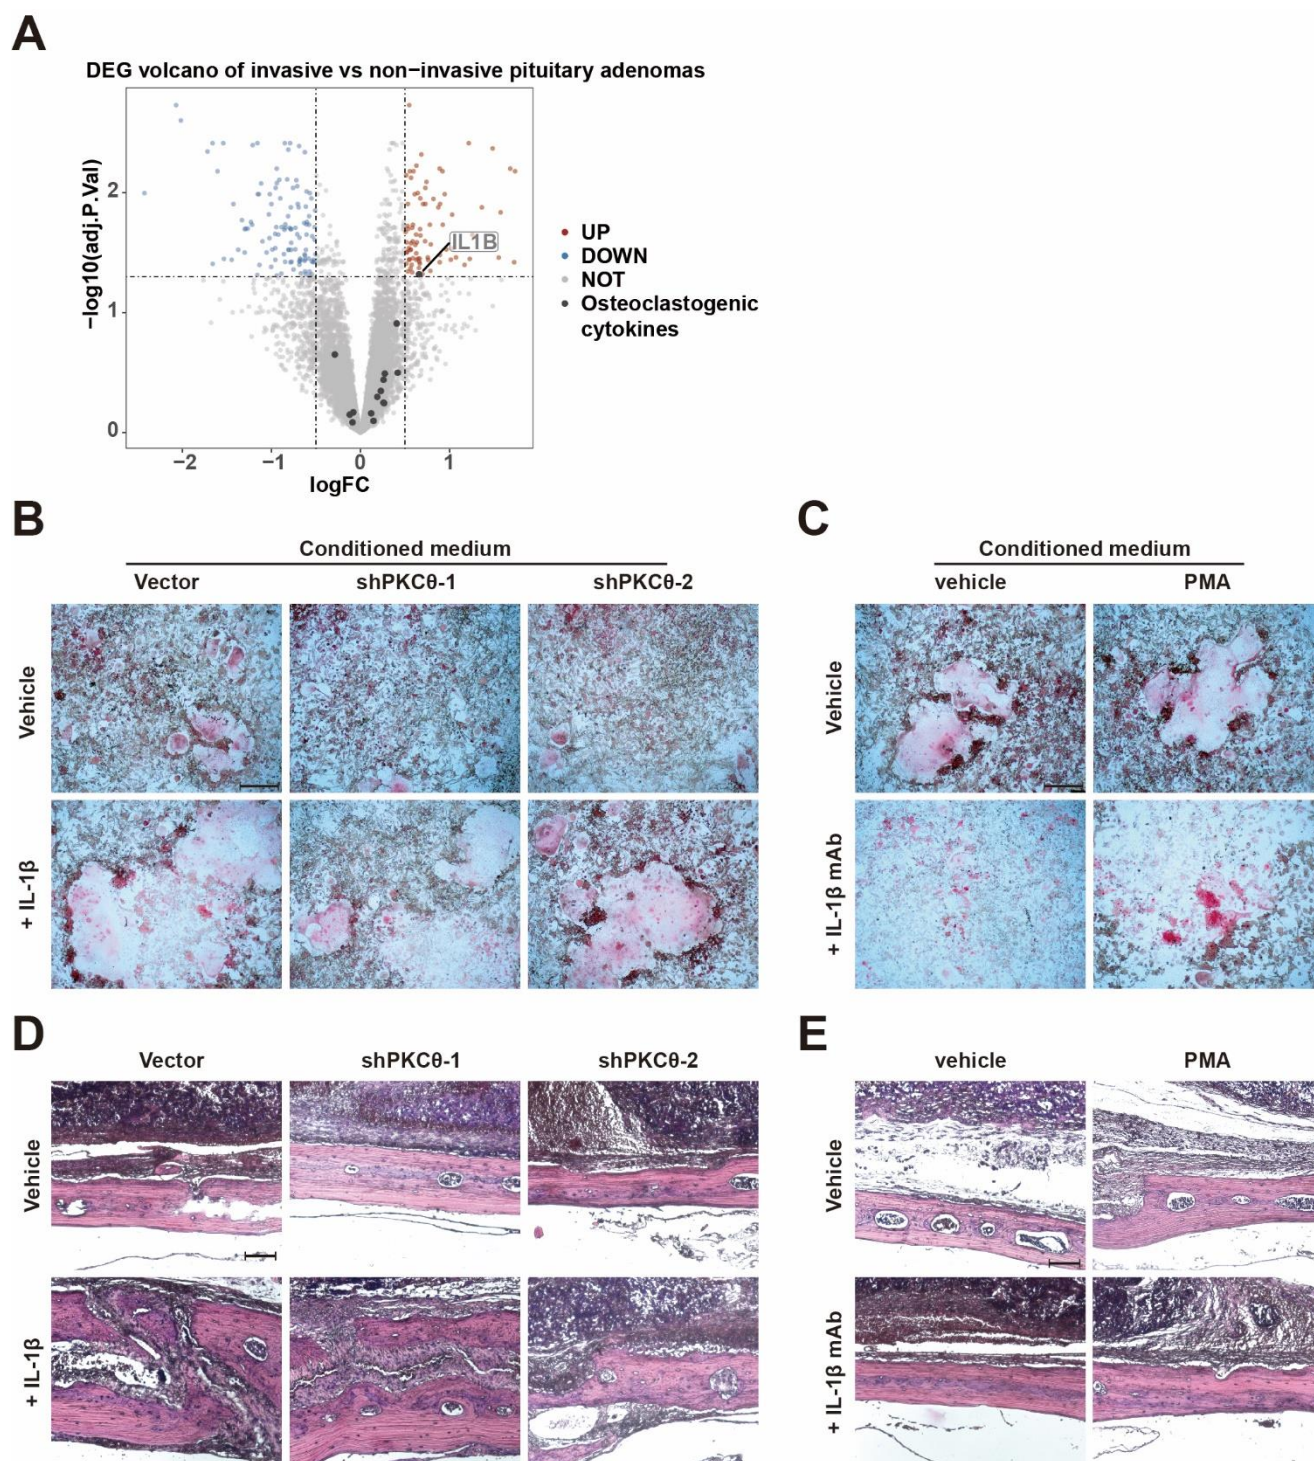

**Figure S4.** Pituitary tumors promote bone invasion by releasing IL1b. **(A)** Volcano plot showing the distribution of DEGs of osteogenic cytokines in BIPAs non-BIPAs (The data analyzed are described in Fig. 2A). **(B)** TRAP staining of RAW264.7 administrated of IL-1β recombinant protein and CM of ATT20 cells in groups of vector and shPKCθ (× 40; scale bar, 500 μm). **(C)** TRAP staining of RAW264.7 administrated of IL-1β mAb and CM medium of ATT20 cells in treatment of PMA (× 40; scale bar, 500 μm). **(D)** HE staining exhibited bone destruction of xenograft tumor of ATT20 while shPKC and administration of IL-1β recombinant protein (× 200; scale bar, 100 μm). **(E)** HE staining exhibited bone destruction of xenograft tumor of ATT20 while administrated of IL-1β mAb and PMA (× 200; scale bar, 100 μm).

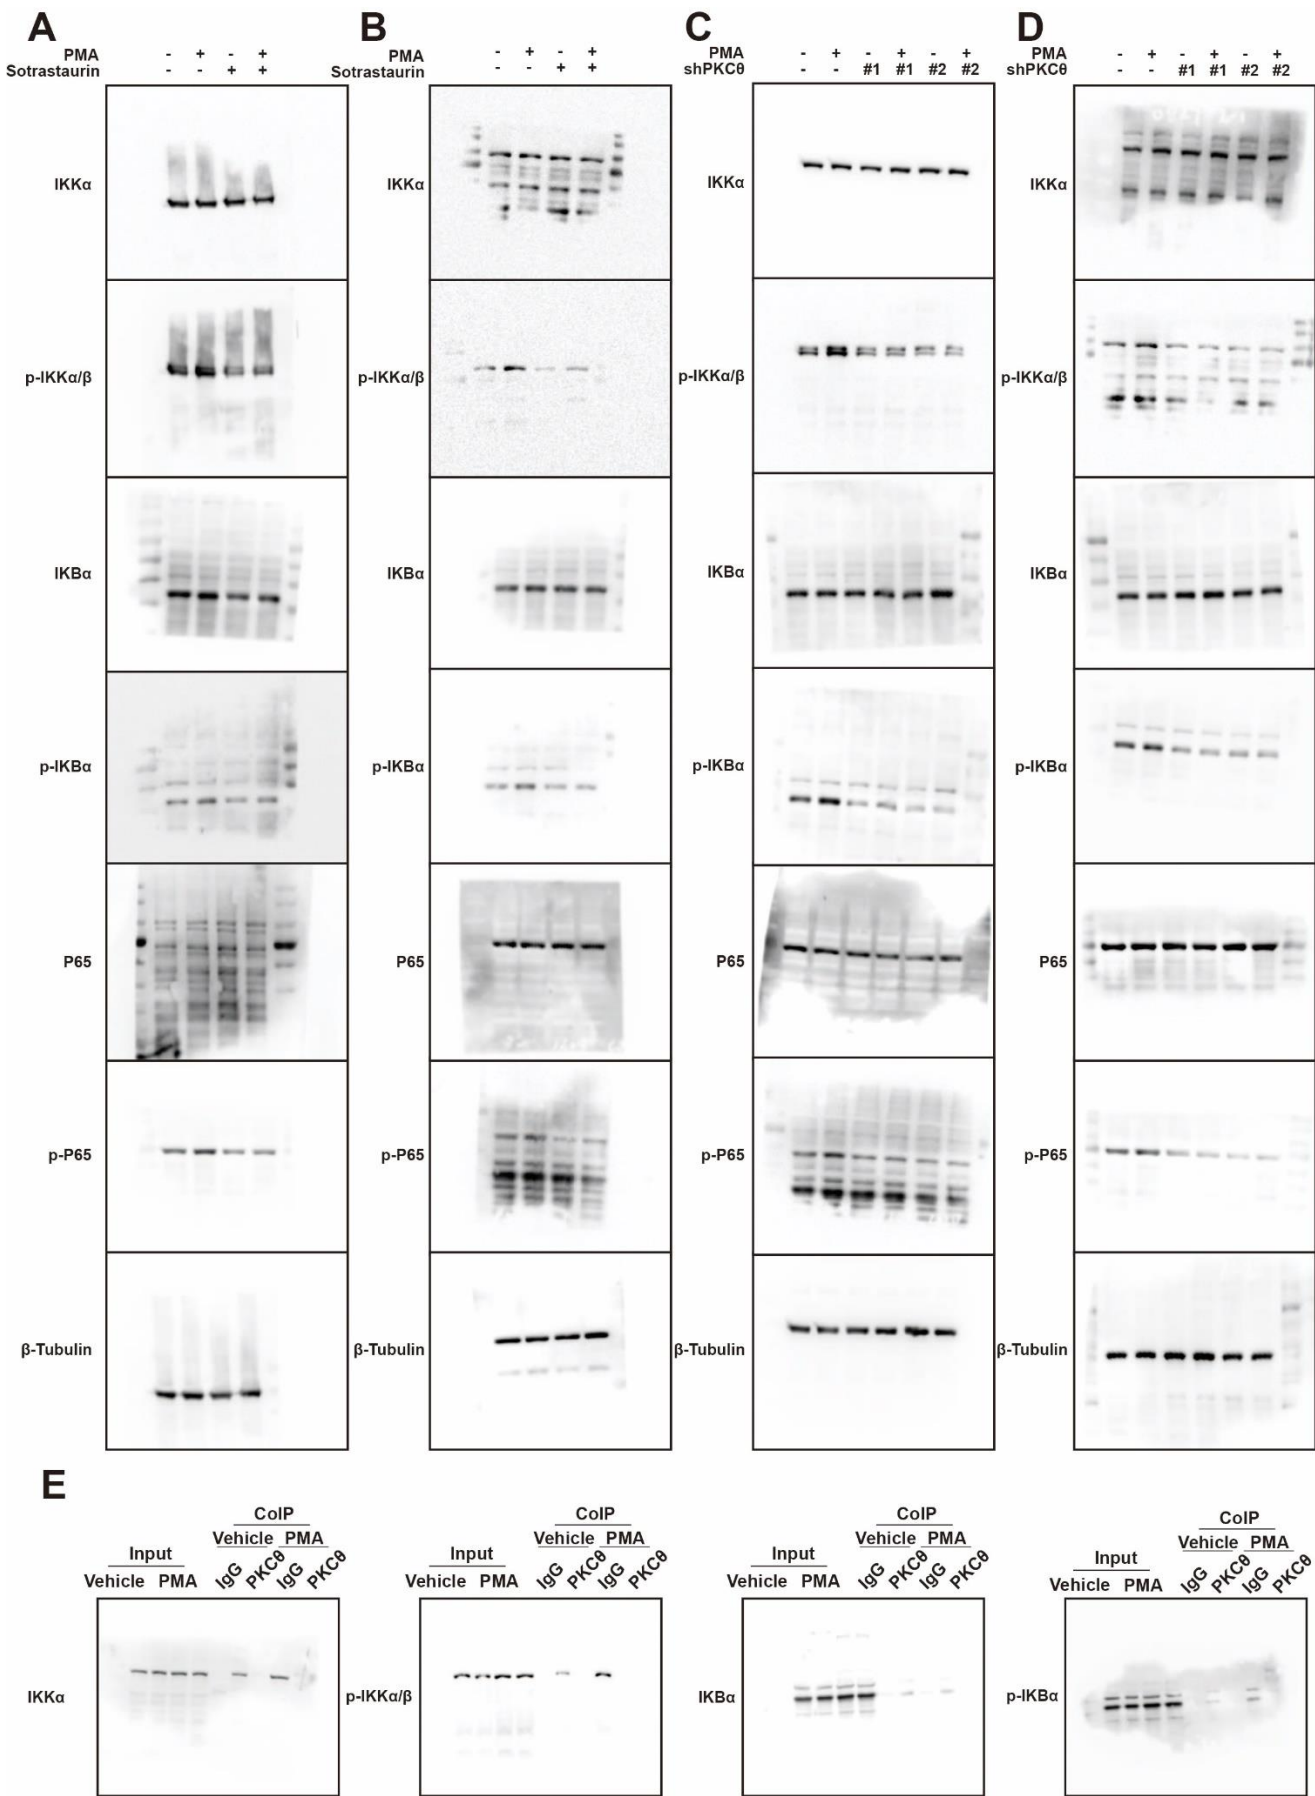

**Figure S5.** Complete picture of WB. (A) Complete picture of **Figure 5K**. (B) Complete picture of **Figure 5L**. (C) Complete picture of **Figure 5M**. (D) Complete picture of **Figure 5N**. (E) Complete picture of **Figure 5P**.

**Table S1.** Primers used in qPCR.

| Gene Name     | Forward Primer                | Reverse Primer                 |
|---------------|-------------------------------|--------------------------------|
| Rat PRKCQ     | 5'-CTCGTGGAACGCAACTAGGC-3'    | 5'-AGAGCAGAACGTGGGTTGAG-3'     |
| Mouse PRKCQ   | 5'-CTCTCACAGCAGCCCTTGAA-3'    | 5'-GCGACATCCTTACCCTTCCC-3'     |
| Rat GAPDH     | 5'-GCATCTTCTTGTGCAGTGCC-3'    | 5'-GATGGTGATGGGTTTCCCGT-3'     |
| Mouse GAPDH   | 5'-GCCTCCTCCAATTCAACCCT-3'    | 5'-CTCGTGGTTCACACCCATCA-3'     |
| Human IL1B    | 5'-ATGATGGCTTATTACAGTGGCAA-3' | 5'-GTCGGAGATTCGTAGCTGGA-3'     |
| Human IL6     | 5'-ACTCACCTCTTCAGAACGAATTG-3' | 5'-CCATCTTTGGAAGGTTTACGGTTG-3' |
| Human TNF     | 5'-CCTCTCTCTAATCAGCCCTCTG-3'  | 5'-GAGGACCTGGGAGTAGATGAG-3'    |
| Human IL13    | 5'-CCTCATGGCGCTTTTGTGAC-3'    | 5'-TCTGGTCTGGGTGATGTTGA-3'     |
| Human IL5     | 5'-TGGAGCTGCCTACGTGTATG-3'    | 5'-TTCGATGAGTAGAAAGCAGTGC-3'   |
| Human IFNB1   | 5'-ATGACCAACAAGTGTCTCTCC-3'   | 5'-GGAATCCAAGCAAGTTGTAGCTC-3'  |
| Human LIF     | 5'-CCAACGTGACGGACTTCCC-3'     | 5'-TACACGACTATGCGGTACAGC-3'    |
| Human CSF1    | 5'-TGGCGAGCAGGAGTATCAC-3'     | 5'-AGGTCTCCATCTGACTGTCAAT-3'   |
| Human CXCL8   | 5'-ACTCCAAACCTTTCCACCCC-3'    | 5'-TTCTCAGCCCTCTTCAAAAACCT-3'  |
| Human IL4     | 5'-CCAACCTGCTTCCCCCTCTG-3'    | 5'-TCTGTTACGGTCAACTCGGTG-3'    |
| Human IFNG    | 5'-TCGGTAACTGACTTGAATGTCCA-3' | 5'-TCGCTTCCCTGTTTTAGCTGC-3'    |
| Human IL18    | 5'-TCTTCATTGACCAAGGAAATCGG-3' | 5'-TCCGGGGTGCATTATCTCTAC-3'    |
| Human IL10    | 5'-GACTTTAAGGGTTACCTGGGTTG-3' | 5'-TCACATGCGCCTTGATGTCTG-3'    |
| Human TNFSF11 | 5'-CAACATATCGTTGGATCACAGCA-3' | 5'-GACAGACTCACTTTATGGGAACC-3'  |
| Human IL15    | 5'-TTGGGAACCATAGATTTGTGCAG-3' | 5'-GGGTGAACATCACTTTCCGTAT-3'   |
| Human IL7     | 5'-TTGGAATCCTCCCCCTGATCC-3'   | 5'-TCGATGCTGACCATTAGAACAC-3'   |
| Human IL1A    | 5'-TGGTAGTAGCAACCAACGGGA-3'   | 5'-ACTTTGATTGAGGGCGTCATTC-3'   |
| Human CCL2    | 5'-CAGCCAGATGCAATCAATGCC-3'   | 5'-TGGAAATCCTGAACCCACTTCT-3'   |
| Human IL17A   | 5'-TCCCACGAAATCCAGGATGC-3'    | 5'-GGATGTTTCAAGTTGACCATCAC-3'  |
| Human IL23A   | 5'-CTCAGGGACAACAGTCAGTTC-3'   | 5'-ACAGGGCTATCAGGGAGCA-3'      |
| Human IL11    | 5'-CGAGCGGACCTACTGTCCTA-3'    | 5'-GCCCAGTCAAGTGTGAGGTG-3'     |
| Human IL2     | 5'-TACAAGAACCCGAACTGACTCG-3'  | 5'-ACATGAAGGTAGTCTCACTGCC-3'   |
| Human IFNA1   | 5'-GCCTCGCCCTTTGCTTTACT-3'    | 5'-CTGTGGGTCTCAGGGAGATCA-3'    |
| Human CCL3    | 5'-AGTTCTCTGCATCACTTGCTG-3'   | 5'-CGGCTTCGCTTGGTTAGGAA-3'     |
| Human CSF2    | 5'-TCCTGAACCTGAGTAGAGACAC-3'  | 5'-TGCTGCTTGTAGTGGCTGG-3'      |
| Human CCL5    | 5'-CCAGCAGTCGTCTTTGTCAC-3'    | 5'-CTCTGGGTTGGCACACACTT-3'     |
| Human IL34    | 5'-CCTGGCTGCGCTATCTTGG-3'     | 5'-AGTGTTTCATGTACTGAAGTCGG-3'  |
| Human TGFB1   | 5'-GGCCAGATCCTGTCCAAGC-3'     | 5'-GTGGGTTTCCACCATTAGCAC-3'    |
